# Supplementary material for: Piecing it together
Source: MDPI journal article supplement (doi:10.3390/ijms23010351), 2009-01-01
Supplement: s1 [file s1]

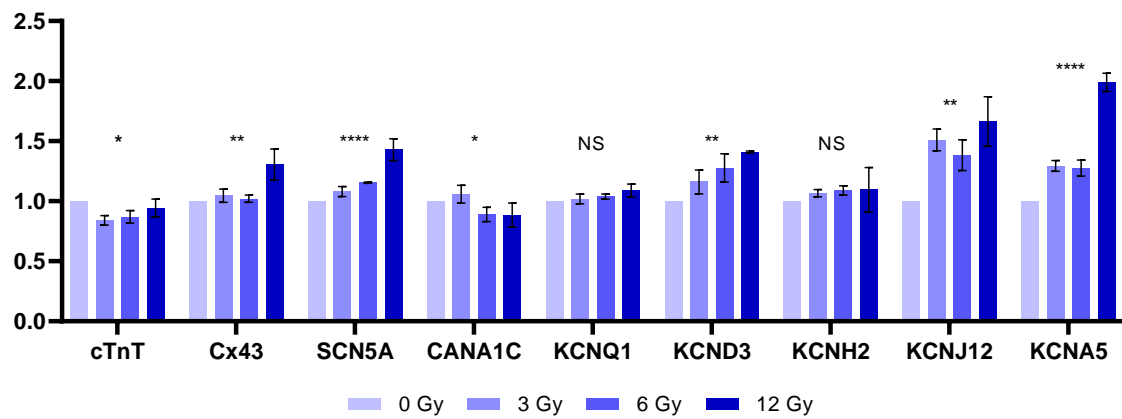

**Figure S1.** Gene expression of human induced pluripotent stem cell-derived cardiomyocyte marker genes and ion channel genes 7 days after irradiation with 0, 3, 6, and 12 Gy. Values are depicted as mean  $\pm$  standard deviation of  $n = 3$ . All p-values are determined by one-way analysis of variance; \* $p < 0.050$ , \*\* $p < 0.010$ , and \*\*\*\* $p < 0.0001$ .

Abbreviation: NS, not significant.

**Table S1.** Primers used for real-time reverse transcription-polymerase chain reaction

| Gene           | Forward primer (5' to 3') | Reverse primer (5' to 3') | Size (bp) | Gene bank No. |
|----------------|---------------------------|---------------------------|-----------|---------------|
| <b>GAPDH</b>   | GTATGACAACAGCCTCAAGA      | GTAGAGGCAGGGATGATGT       | 216       | NM_002046     |
| <b>cTnT</b>    | GGGTACATCCAGAAGACAG       | GTTATAGATGCTCTGCCACA      | 163       | NM_000364     |
| <b>Cx43</b>    | TGTGGCTGTCAGTACTTTTC      | AGTGTGGGTACAGACACAAA      | 199       | AF151980.2    |
| <b>SCN5A</b>   | TCACCACCTACATCATCATC      | GACAGGACCGAATACTCAAT      | 190       | AY038064      |
| <b>CACNA1C</b> | CCATCTACAACCTACCGTGTG     | ACCACGTACCACACTTTGTA      | 247       | NM_1994603    |
| <b>KCND3</b>   | CTACTACATCGGTCTGGTCA      | TGAGGGAGAAGAGAAGAAAG      | 179       | NM_004980     |
| <b>KCNH2</b>   | CCTCCATCAAGGACAAGTAT      | GAAGATGCTAGCGTACATGA      | 155       | AF363636      |
